# Supplementary material
Source: PubMed Central journal article supplement (PMC6314267)
Supplement: 10.1194_P089953_jlr.P089953-1.pdf [file 10.1194_P089953_jlr.P089953-1.pdf]

**Supplemental Table S1: Clinical and biochemical features of the control group included in the association analysis of the rs72613567 variant and NAFLD (fatty liver) as disease trait**

| <b>Variables</b>                     | <b>Control subjects (no-NAFLD) that matched patients with NAFLD-MetS</b> | <b>Control subjects (no-NAFLD) that matched morbidly obese patients with NAFLD</b> |
|--------------------------------------|--------------------------------------------------------------------------|------------------------------------------------------------------------------------|
| <b>Number of subjects</b>            | 147                                                                      | 33                                                                                 |
| <b>Female, %</b>                     | 59                                                                       | 70                                                                                 |
| <b>Age, years</b>                    | 45±19                                                                    | 40±12                                                                              |
| <b>BMI, kg/m<sup>2</sup></b>         | 25±4                                                                     | 54±11                                                                              |
| <b>Fasting plasma glucose, mg/dL</b> | 84±15                                                                    | 98±17                                                                              |
| <b>Fasting plasma insulin, µU/ml</b> | 6.8±4.7                                                                  | 12±6                                                                               |
| <b>HOMA-IR index</b>                 | 1.44±1.05                                                                | 2.88±1.7                                                                           |
| <b>Hb1C</b>                          | 5.3±1.2                                                                  | 6.1±1.2                                                                            |
| <b>Total cholesterol, mg/dL</b>      | 204±41                                                                   | 181±38                                                                             |
| <b>HDL-cholesterol, mg/dL</b>        | 56±16                                                                    | 40±8.5                                                                             |
| <b>LDL-cholesterol, mg/dL</b>        | 124±38                                                                   | 118±31                                                                             |
| <b>Triglycerides, mg/dL</b>          | 120±78                                                                   | 136±57                                                                             |
| <b>Uric acid, mg/dL</b>              | 3.4±1.4                                                                  | 5.7±1.8                                                                            |
| <b>ALT, U/L</b>                      | 22±4                                                                     | 23±9                                                                               |
| <b>AST, U/L</b>                      | 18±3                                                                     | 21±11                                                                              |

BMI: body mass index; HOMA: homeostatic model assessment; HbA1c: glycated haemoglobin; ALT and AST: Serum alanine and aspartate aminotransferase. Results are expressed as mean±SD.
