# Supplementary material
Source: PubMed Central journal article supplement (PMC6314267)
Supplement: 10.1194_P089953_jlr.P089953-4.pdf [file 10.1194_P089953_jlr.P089953-4.pdf]

**Supplemental Table S2: The gene list for differentially expressed genes in the liver of patients carrying the rs72613567 (-/-) genotype relative to the expression levels of patients homozygous for the A-INS allele**

| <b>Gene Symbol</b> | <b>Gene Name</b>                                         | <b>Regulation</b> | <b>Fold Change</b> | <b>p value</b> |
|--------------------|----------------------------------------------------------|-------------------|--------------------|----------------|
| ABCA9              | ATP-binding cassette, sub-family A (ABC1), member 9      | up                | 3.39               | 0.0462993      |
| ADAMTSL5           | ADAMTS-like 5                                            | up                | 2.04               | 0.0396808      |
| ANKRD45            | ankyrin repeat domain 45                                 | up                | 2.25               | 0.0480314      |
| ANP32A-IT1         | ANP32A intronic transcript 1 (non-protein coding)        | up                | 3.84               | 0.0353008      |
| AP1B1              | adaptor-related protein complex 1, beta 1 subunit        | up                | 2.66               | 0.0462595      |
| BMP8B              | bone morphogenetic protein 8b                            | up                | 3.39               | 0.0320174      |
| C2orf49            | chromosome 2 open reading frame 49                       | up                | 2.34               | 0.004706       |
| CAPZB              | capping protein (actin filament) muscle Z-line, beta     | up                | 2.43               | 1.19E-04       |
| CASP10             | caspase 10, apoptosis-related cysteine peptidase         | up                | 2.16               | 0.0206747      |
| CELF6              | CUGBP, Elav-like family member 6                         | up                | 2.16               | 0.0311686      |
| COL27A1            | collagen, type XXVII, alpha 1                            | up                | 2.41               | 0.0452788      |
| CRYBB2P1           | crystallin, beta B2 pseudogene 1                         | up                | 4.34               | 0.0195731      |
| CTSL               | cathepsin L                                              | up                | 2.23               | 0.034996       |
| CYTH1              | cytohesin 1                                              | up                | 3.48               | 0.0291492      |
| FAM151A            | family with sequence similarity 151, member A            | up                | 2.04               | 0.0343721      |
| FAM212A            | family with sequence similarity 212, member A            | up                | 3.93               | 0.0363373      |
| FAT3               | FAT atypical cadherin 3                                  | up                | 4.47               | 0.0389702      |
| FOXP1              | forkhead box P1                                          | up                | 2.08               | 0.0472945      |
| GJD4               | gap junction protein, delta 4, 40.1kDa                   | up                | 2.03               | 0.035218       |
| GNG13              | guanine nucleotide binding protein (G protein), gamma 13 | up                | 14.26              | 0.0221911      |
| GSN                | gelsolin                                                 | up                | 2.83               | 0.049937       |
| HAMP               | hepcidin antimicrobial peptide                           | up                | 2.1                | 0.0114148      |
| HNRNPAB            | heterogeneous nuclear ribonucleoprotein A/B              | up                | 2.4                | 0.0170917      |
| HRASLS5            | HRAS-like suppressor family, member 5                    | up                | 2.47               | 0.0271769      |

|                 |                                                                              |    |       |           |
|-----------------|------------------------------------------------------------------------------|----|-------|-----------|
| HSCB            | HscB mitochondrial iron-sulfur cluster co-chaperone                          | up | 2.44  | 0.031648  |
| ID4             | inhibitor of DNA binding 4, dominant negative helix-loop-helix protein       | up | 3.59  | 0.0486833 |
| KIAA1654        | KIAA1654 protein                                                             | up | 2.44  | 0.045243  |
| KIAA1804        | mixed lineage kinase 4                                                       | up | 2.12  | 0.0100922 |
| KRBA2           | KRAB-A domain containing 2                                                   | up | 2.8   | 0.041867  |
| KRT81           | keratin 81, type II                                                          | up | 2.01  | 0.0407078 |
| LANCL3          | LanC lantibiotic synthetase component C-like 3 (bacterial)                   | up | 2.36  | 0.0055868 |
| LINC01197       | long intergenic non-protein coding RNA 1197                                  | up | 10.35 | 0.0402064 |
| LINC01488       | long intergenic non-protein coding RNA 1488                                  | up | 5.5   | 0.0032362 |
| lnc-BHLHE41-2:7 | RASSF8 antisense RNA 1                                                       | up | 2.78  | 0.0422531 |
| lnc-CHL1-1      | lnc-CHL1-1:1                                                                 | up | 2.15  | 0.0413147 |
| lnc-SEZ6L2-1    | lnc-SEZ6L2-1:1                                                               | up | 2.62  | 0.0227637 |
| LOC101927285    | uncharacterized LOC101927285                                                 | up | 2.05  | 0.0033293 |
| LOC101929622    | Uncharacterized LOC101929622                                                 | up | 2.23  | 0.0461935 |
| LOC102725353    | uncharacterized LOC102725353                                                 | up | 3.15  | 0.0425273 |
| LOC284014       | uncharacterized LOC284014                                                    | up | 2.47  | 0.0438751 |
| LOC494150       | prohibitin pseudogene                                                        | up | 2.33  | 0.0268813 |
| LOC729609       | uncharacterized LOC729609                                                    | up | 2.35  | 0.0292545 |
| MFS7            | major facilitator superfamily domain containing 7                            | up | 2.98  | 0.0245548 |
| MMACHC          | methylmalonic aciduria (cobalamin deficiency) cblC type, with homocystinuria | up | 6.31  | 0.0479286 |
| MON1B           | MON1 secretory trafficking family member B                                   | up | 3.94  | 0.0374259 |
| MRGPRF-AS1      | MRGPRF antisense RNA 1                                                       | up | 2.82  | 0.0386637 |
| MRPS16          | mitochondrial ribosomal protein S16                                          | up | 3.01  | 0.0335315 |
| MSTO1           | misato 1, mitochondrial distribution and morphology regulator                | up | 3.73  | 0.0327853 |
| MUC5AC          | mucin 5AC, oligomeric mucus/gel-forming                                      | up | 8.77  | 0.0364223 |
| NMT1            | N-myristoyltransferase 1                                                     | up | 2.31  | 9.06E-04  |

|             |                                                                        |      |      |           |
|-------------|------------------------------------------------------------------------|------|------|-----------|
| NPIP5       | nuclear pore complex interacting protein family, member B5             | up   | 2.46 | 0.0252674 |
| NUPL2       | nucleoporin like 2                                                     | up   | 3.29 | 0.0134238 |
| PALM3       | paralemmin 3                                                           | up   | 2.29 | 0.0372098 |
| RBMX2       | RNA binding motif protein, X-linked 2                                  | up   | 2.23 | 0.0495764 |
| RPL32       | ribosomal protein L32                                                  | up   | 6.67 | 0.0361019 |
| SCGB3A1     | secretoglobin, family 3A, member 1                                     | up   | 3.57 | 0.0479767 |
| SLC2A11     | solute carrier family 2 (facilitated glucose transporter), member 11   | up   | 2.63 | 0.0396241 |
| SLC2A6      | solute carrier family 2 (facilitated glucose transporter), member 6    | up   | 2.46 | 0.0338288 |
| SPRR2D      | small proline-rich protein 2D                                          | up   | 2.54 | 0.0435365 |
| SUZ12P1     | suppressor of zeste 12 homolog pseudogene 1                            | up   | 3.06 | 0.0351428 |
| TEKT4P2     | tektin 4 pseudogene 2                                                  | up   | 5.69 | 0.0496765 |
| TM6SF2      | transmembrane 6 superfamily member 2                                   | up   | 3.22 | 0.0180299 |
| TMED7-ICAM2 | TMED7-TICAM2 readthrough                                               | up   | 2.05 | 0.0308908 |
| TMEM201     | transmembrane protein 201                                              | up   | 2.36 | 0.0209321 |
| TMEM52      | transmembrane protein 52                                               | up   | 2.32 | 0.0252226 |
| TMSB4X      | thymosin beta 4, X-linked                                              | up   | 3.73 | 0.0256983 |
| TNRC6C      | trinucleotide repeat containing 6C                                     | up   | 2.1  | 0.0053377 |
| TRPC6       | transient receptor potential cation channel, subfamily C, member 6     | up   | 2.02 | 0.0218516 |
| U2AF1       | U2 small nuclear RNA auxiliary factor 1                                | up   | 2.18 | 0.0015082 |
| WIPF3       | WAS/WASL interacting protein family, member 3                          | up   | 7.39 | 0.044222  |
| XRCC3       | X-ray repair complementing defective repair in Chinese hamster cells 3 | up   | 2.65 | 0.0422438 |
| ZBTB20-AS1  | ZBTB20 antisense RNA 1                                                 | up   | 2.41 | 0.0217724 |
| ACTA1       | actin, alpha 1, skeletal muscle                                        | down | 5.5  | 0.0386477 |
| ADCY1       | adenylate cyclase 1 (brain)                                            | down | 2.35 | 0.0380738 |
| ADH1A       | alcohol dehydrogenase 1A (class I), alpha polypeptide                  | down | 2.39 | 0.0310509 |

|         |                                                                                     |          |      |           |
|---------|-------------------------------------------------------------------------------------|----------|------|-----------|
| ALDH1L1 | aldehyde dehydrogenase 1 family, member L1                                          | down     | 2.37 | 0.0489657 |
| ANXA6   | annexin A6                                                                          | down     | 2.17 | 0.0152409 |
| APOC1   | apolipoprotein C-I                                                                  | down     | 2.14 | 0.0468484 |
| B2M     | beta-2-microglobulin                                                                | down     | 3.14 | 0.0228742 |
| C3      | complement component 3                                                              | down     | 3.36 | 0.027257  |
| CALM2   | calmodulin 2 (phosphorylase kinase, delta)                                          | down     | 2.48 | 0.0144093 |
| CFB     | complement factor B                                                                 | down     | 2.71 | 0.0492516 |
| CFH     | complement factor H                                                                 | down     | 3.61 | 0.0202421 |
| CFH     | complement factor H                                                                 | down     | 2.17 | 0.0015635 |
| CFHR1   | complement factor H-related 1                                                       | down     | 2.47 | 0.0423887 |
| CFHR4   | complement factor H-related 4                                                       | down     | 3.3  | 0.0052714 |
| CGN     |                                                                                     | cingulin | down | 2.01      |
| CREB3L3 | cAMP responsive element binding protein 3-like 3                                    | down     | 2.28 | 3.22E-04  |
| CSTB    | cystatin B (stefin B)                                                               | down     | 2.34 | 0.0084127 |
| CTDSP2  | CTD (carboxy-terminal domain, RNA polymerase II, polypeptide A) small phosphatase 2 | down     | 2.2  | 0.0249645 |
| CTSB    | cathepsin B                                                                         | down     | 2.08 | 0.0114165 |
| DBI     | diazepam binding inhibitor (GABA receptor modulator, acyl-CoA binding protein)      | down     | 3.14 | 0.0200239 |
| DDT     | D-dopachrome tautomerase                                                            | down     | 2.21 | 0.018368  |
| EEF1A1  | eukaryotic translation elongation factor 1 alpha 1                                  | down     | 2.49 | 0.0157782 |
| EEF1A1  | eukaryotic translation elongation factor 1 alpha 1                                  | down     | 4.25 | 0.0427931 |
| EIF3H   | eukaryotic translation initiation factor 3, subunit H                               | down     | 2    | 0.0294679 |
| F2      | coagulation factor II (thrombin)                                                    | down     | 2.5  | 0.046989  |
| FGG     | fibrinogen gamma chain                                                              | down     | 3.04 | 0.0422065 |
| FGL1    | fibrinogen-like 1                                                                   | down     | 4.01 | 0.0064635 |
| FTH1    | ferritin, heavy polypeptide 1                                                       | down     | 2.05 | 0.004762  |
| FTH1    | ferritin, heavy polypeptide 1                                                       | down     | 2.32 | 0.015742  |
| H19     | H19, imprinted maternally expressed transcript (non-protein                         | down     | 2.42 | 0.0024268 |

|          |                                                        |      |      |           |
|----------|--------------------------------------------------------|------|------|-----------|
|          | coding)                                                |      |      |           |
| H3F3A    | H3 histone, family 3A                                  | down | 2.28 | 0.0315726 |
| HBB      | hemoglobin, beta                                       | down | 4.71 | 3.81E-04  |
| HBD      | hemoglobin, delta                                      | down | 3.76 | 0.0084196 |
| HINT1    | histidine triad nucleotide binding protein 1           | down | 3.31 | 0.0498857 |
| HLA-A    | major histocompatibility complex, class I, A           | down | 2.43 | 0.0118741 |
| HLA-B    | major histocompatibility complex, class I, B           | down | 3.11 | 6.68E-04  |
| HLA-B    | major histocompatibility complex, class I, B           | down | 2.48 | 0.0051926 |
| HLA-B    | major histocompatibility complex, class I, B           | down | 2.22 | 0.0059736 |
| HLA-C    | major histocompatibility complex, class I, C           | down | 2.32 | 0.0020935 |
| HLA-DMB  | major histocompatibility complex, class II, DM beta    | down | 2.32 | 0.0134408 |
| HLA-DOA  | major histocompatibility complex, class II, DO alpha   | down | 2.35 | 0.016079  |
| HLA-DPA1 | major histocompatibility complex, class II, DP alpha 1 | down | 2.28 | 0.017891  |
| HLA-DPB1 | major histocompatibility complex, class II, DP beta 1  | down | 3.37 | 0.0019298 |
| HLA-DPB1 | major histocompatibility complex, class II, DP beta 1  | down | 2.06 | 0.0177327 |
| HLA-DRB4 | major histocompatibility complex, class II, DR beta 4  | down | 2.14 | 0.0297846 |
| HNRNPA1  | heterogeneous nuclear ribonucleoprotein A1             | down | 2.07 | 0.0472559 |
| HRG      | histidine-rich glycoprotein                            | down | 2.9  | 0.0207603 |
| IFITM1   | interferon induced transmembrane protein 1             | down | 2.01 | 0.013859  |
| INHBB    | inhibin, beta B                                        | down | 2.87 | 0.0053778 |
| IRS2     | insulin receptor substrate 2                           | down | 2.12 | 0.0319211 |
| ITIH3    | inter-alpha-trypsin inhibitor heavy chain 3            | down | 2.32 | 0.0098177 |
| KNG1     | kininogen 1                                            | down | 2.24 | 0.0476804 |
| MGST3    | microsomal glutathione S-transferase 3                 | down | 2.26 | 0.0290824 |
| NAPRT    | nicotinate phosphoribosyltransferase                   | down | 2    | 0.0239072 |
| OCIAD2   | OCIA domain containing 2                               | down | 2    | 0.0468033 |
| PGM1     | phosphoglucomutase 1                                   | down | 2.15 | 0.0399774 |
| PSPH     | phosphoserine phosphatase                              | down | 4.15 | 0.0419853 |
| RPL11    | ribosomal protein L11                                  | down | 2.33 | 0.0194719 |

|          |                                                                                     |      |      |           |
|----------|-------------------------------------------------------------------------------------|------|------|-----------|
| RPL15    | ribosomal protein L15                                                               | down | 2.37 | 0.0286675 |
| RPL23A   | ribosomal protein L23a                                                              | down | 2.15 | 0.0094156 |
| RPL26    | ribosomal protein L26                                                               | down | 2.71 | 0.0158642 |
| RPL30    | ribosomal protein L30                                                               | down | 2.43 | 0.0317708 |
| RPL31    | ribosomal protein L31                                                               | down | 2.38 | 0.0465085 |
| RPL41    | ribosomal protein L41                                                               | down | 3.23 | 0.0180157 |
| RPL5     | ribosomal protein L5                                                                | down | 2.11 | 0.0321531 |
| RPL6     | ribosomal protein L6                                                                | down | 3.49 | 0.0352559 |
| RPLP0    | ribosomal protein, large, P0                                                        | down | 2.77 | 0.0384759 |
| RPS14    | ribosomal protein S14                                                               | down | 2.19 | 0.0422126 |
| RPS15A   | ribosomal protein S15a                                                              | down | 2.02 | 0.0018423 |
| RPS15A   | ribosomal protein S15a                                                              | down | 2.38 | 0.023422  |
| RPS18    | ribosomal protein S18                                                               | down | 2.71 | 0.0212399 |
| RPS25    | ribosomal protein S25                                                               | down | 2.09 | 0.0407624 |
| RPS27    | ribosomal protein S27                                                               | down | 2.49 | 0.0412466 |
| RPS29    | ribosomal protein S29                                                               | down | 2.9  | 0.026976  |
| RPS29    | ribosomal protein S29                                                               | down | 2.15 | 0.0203665 |
| RPS7     | ribosomal protein S7                                                                | down | 2.61 | 0.0272166 |
| RPS7     | ribosomal protein S7                                                                | down | 2.79 | 0.0419834 |
| SEPT9    | septin 9                                                                            | down | 2.16 | 0.0134801 |
| SERPINA3 | serpin peptidase inhibitor, clade A (alpha-1 antiproteinase, antitrypsin), member 3 | down | 2.21 | 0.02756   |
| SERPINC1 | serpin peptidase inhibitor, clade C (antithrombin), member 1                        | down | 4.63 | 0.0473931 |
| SLC3A1   | solute carrier family 3 (amino acid transporter heavy chain), member 1              | down | 3.06 | 0.0073644 |
| SNHG5    | small nucleolar RNA host gene 5 (non-protein coding)                                | down | 2.11 | 0.0392264 |
| SRP14    | signal recognition particle 14kDa (homologous Alu RNA binding protein)              | down | 2.17 | 0.03249   |
| TMBIM6   | transmembrane BAX inhibitor motif containing 6                                      | down | 2.11 | 0.0218545 |

|       |                                                               |      |      |           |
|-------|---------------------------------------------------------------|------|------|-----------|
| TOMM7 | translocase of outer mitochondrial membrane 7 homolog (yeast) | down | 3.63 | 0.0280067 |
| UBC   | ubiquitin C                                                   | down | 2.24 | 0.037487  |
| UBC   | ubiquitin C                                                   | down | 2.3  | 0.0389987 |
| UBD   | ubiquitin D                                                   | down | 4.96 | 0.0132937 |
